# Supplementary material
Source: PubMed Central journal article supplement (PMC2785282)
Supplement: 0907925106_0907925106SI.pdf [file 0907925106_0907925106SI.pdf]

# Supporting Information

Analise et al. 10.1073/pnas.0907925106

## SI Text

**Bacterial Strains, Media, and DNA Manipulations.** The media were supplemented with hygromycin (HYG) (75  $\mu\text{g}/\text{mL}$ ), KAN (5  $\mu\text{g}/\text{mL}$  or 25  $\mu\text{g}/\text{mL}$ ), or sucrose (5%) when needed for cultivation of *M. tuberculosis* strains. For *Escherichia coli* strains, Luria media was supplemented with HYG (200  $\mu\text{g}/\text{mL}$ ), KAN (50  $\mu\text{g}/\text{mL}$ ), or carbenicillin (100  $\mu\text{g}/\text{mL}$ ) when needed. Antibiotics were purchased from Sigma. Standard protocols or the manufacturer's instructions were used for all DNA manipulations (New England Biolabs/Invitrogen/Finnzymes). All oligonucleotide primers (Table S3) were synthesized at the Biotechnology Core facility, National Center for Preparedness, Detection, and Control of Infectious Diseases, Centers for Disease Control and Prevention (CDC). Clinical isolates were obtained from the culture collection at the Mycobacteriology Laboratory Branch, CDC. Human subject information linked to the clinical isolates used in this study is protected by the protocol approved by the CDC institutional review board.

**Construction and Screening of the K204 Cosmid Library.** A cosmid library of Sau3AI partial digest products of *M. tuberculosis* K204 in pYUB178-hyg [a derivative of pYUB178 (1) in which the KAN<sup>R</sup> cassette has been replaced with a HYG<sup>R</sup> cassette] was constructed and electroporated into *M. tuberculosis* H37Rv bacteria using standard methods. Transformants were selected on 7H10 agar plates containing either HYG alone or HYG and KAN. Genomic DNA was extracted from individual KAN<sup>R</sup> transformants and analyzed by RATE (2) using primers specific to the pYUB178-hyg plasmid.

**Construction of Recombinant Cosmids pAZ10 (pYUB854::*eis*::*Rv2415c*) and pAZ19 (pYUB854::*eisC-14T*::*Rv2415c*) for Allelic Exchange.** The *Rv2415c* gene was amplified from the H37Rv genome using primers AZ151 and AZ152 and cloned into the XhoI/SpeI sites of pYUB854 after digestion with XhoI and SpeI, forming pAZ09 (pYUB854::*Rv2415c*). The *eis* gene and 1 kb of upstream sequence were amplified from the H37Rv genome or the K204 genome using primers AZ149 and AZ150. The fragments were digested with StuI and XbaI and cloned into pAZ09 (pYUB854::*Rv2415c*) to generate pAZ10 (pYUB854::*eis*::*Rv2415c*) or pAZ19 (pYUB854::*eisC-14T*::*Rv2415c*).

These cosmids harbor the *eis* and downstream gene, *Rv2415c* separated by a HYG<sup>R</sup> cassette.

**Construction of Specialized Transducing Phages phAlexWT and phAlexC-14T.** The specialized transducing phages phAlexWT or phAlexC-14T were generated from pAZ10 (pYUB854::*eis*::*Rv2415c*) or pAZ19 (pYUB854::*eisC-14T*::*Rv2415c*) and phAE159 as previously described (1). *M. tuberculosis* H37Rv bacteria or K204 bacteria were infected with phAlexC-14T or phAlexWT at a multiplicity of infection of 10:1 and selected on 7H10 containing HYG. Genomic DNA from individual transductants was sequenced and analyzed by mismatch amplification mutation assay-PCR using primers optimized for either the *eisC-14T* (AZ199 and AZ87) or WT (AZ198 and AZ87) allele using Promega Master Mix Taq.

**Construction of Mutants and Complemented Strains.** An unmarked deletion of *eis* (bases -32 to 1204 were removed) was constructed using pYUB854, phAE159, and pYUB870 as previously described (1). The final unmarked deletion of *eis* was confirmed by PCR. To complement the knockout strain, the *eis* ORF and 520 bp upstream of *eis* were amplified by PCR from genomic DNA of representative clinical isolates using primers AZ107 and AZ108, cloned into pHIN-STOP, and electroporated into H37Rv $\Delta$ *eis*. Complemented strains were confirmed by PCR using internal *eis* primers AZ80 and AZ87 and sequencing. Promoter truncation derivatives of the *eis* promoter were amplified by PCR from K204 genomic DNA using primers AZ167 to AZ174 and AZ108, cloned into pHIN-STOP, and electroporated into H37Rv $\Delta$ *eis*. Integration of the truncated promoter constructs was confirmed by PCR using primers HYG9F and AZ87 and sequencing.

**MIC Determination.** The susceptibilities to KAN and AMK were determined according to guidelines and definitions stated by the CLSI (3), using 7H10 agar containing KAN (Sigma) at concentrations of 1, 2, 3, 4, 5, 10, 15, 20, 25, 30, 35, 40, 50, and 80  $\mu\text{g}/\text{mL}$  or AMK (Sigma) at concentrations of 0.25, 0.5, 1, 2, 3, and 4  $\mu\text{g}/\text{mL}$ . The MIC was defined as the lowest concentration of drug resulting in complete inhibition of growth or in growth of  $\leq 1\%$  of the initial inoculum after 4 weeks of incubation at 37 °C.

1. Bardarov S, et al. (1997) Conditionally replicating mycobacteriophages: A system for transposon delivery to *Mycobacterium tuberculosis*. *Proc Natl Acad Sci USA* 94:10961–10966.
2. Kim J, Carver EA, Stubbs L (1997) Amplification and sequencing of end fragments from bacterial artificial chromosome clones by single-primer polymerase chain reaction. *Anal Biochem* 253:272–275.

3. National Committee for Clinical Laboratory Standards (2003) Susceptibility testing of mycobacteria, nocardiae, and other aerobic actinomycetes; approved standard M24-A. (National Committee for Clinical Laboratory Standards, Wayne, PA).

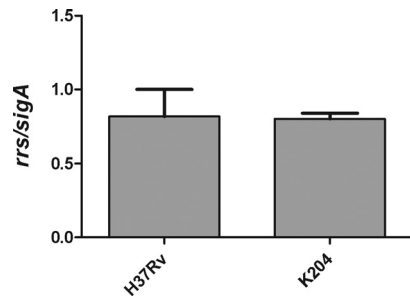

**Fig. S1.** *sigA* transcript levels in H37Rv and K204. The ratio of *sigA*rrs(16S rRNA) transcripts was determined by qRT-PCR and normalized to H37Rv. Error bars represent the standard deviation of 3 independent experiments.

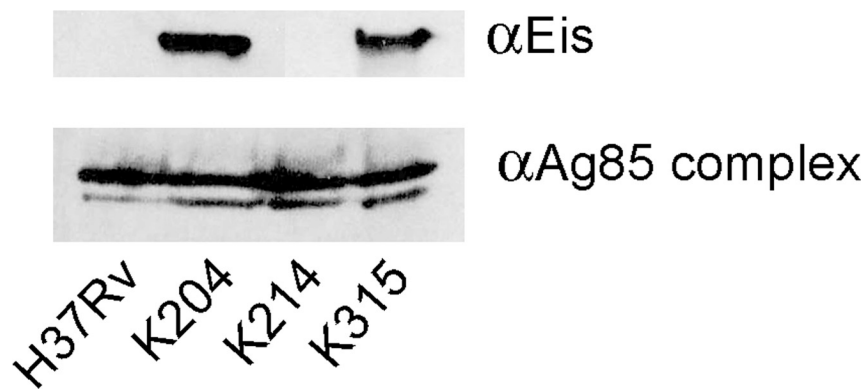

**Fig. S2.** Immunoblot analysis of cell filtrate proteins generated from strains harboring either WT (H37Rv, K214) or the C-14T *eis* allele (K204, K315) shows that Eis is present in the culture supernatants of C-14T promoter mutants. The lysates were probed with either anti-Eis or anti-Ag85 complex serum (Colorado State University).

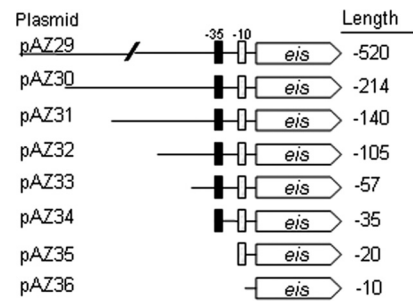

**Fig. S3.** Promoter truncation constructs in the pHIN-STOP plasmid backbone (Table S2). A plasmid containing each construct was used to complement the H37RvΔ*eis* strain. *Eis* expression and activity for each complement was analyzed by qRT-PCR and acetyltransferase activity analysis (data in Fig. 2). Length indicates the amount of sequence upstream from the *eis* start codon present on the complementing plasmid. Black and gray boxes represent the -35 and -10 promoter regions, respectively.



**Table S1. Strains used in this study**

| Strain                            | Genotype/relevant characteristics                                                                                                          | Reference or source |
|-----------------------------------|--------------------------------------------------------------------------------------------------------------------------------------------|---------------------|
| <i>E. coli</i>                    |                                                                                                                                            |                     |
| HB101                             | F- $\Delta$ (gpt-proA)62, leuB6, glnV44, ara-14, galK2, lacY1, $\Delta$ (mcrC-mrr), rpsL20(Str <sup>r</sup> ), xyl-5, mtl-1, recA13, thi-1 | NEB                 |
| BL21 Gold                         | F- ompT hsdS(rB- mB-) dcm + Tet <sup>r</sup> gal (DE3) endA Hte                                                                            | Novagen             |
| <i>M. smegmatis</i>               |                                                                                                                                            |                     |
| LR222                             | Easily transformable strain, used for phage preparation                                                                                    | Miller et al. (1)   |
| <i>M. tuberculosis</i>            |                                                                                                                                            |                     |
| H37Rv                             | Pansusceptible laboratory strain                                                                                                           |                     |
| K204                              | Spontaneous Kan <sup>r</sup> mutant of H37Rv                                                                                               | Maus et al. (2)     |
| K315, K317                        | H37Rv with <i>eisC</i> -14T allele, Hyg <sup>r</sup> introduced by allelic exchange                                                        | This study          |
| K214, K215                        | K204 with <i>eis</i> WT allele, Hyg <sup>r</sup> introduced by allelic exchange                                                            | This study          |
| Rv $\Delta$ <i>eis</i>            | Unmarked <i>eis</i> deletion strain of H37Rv                                                                                               | This study          |
| Rv $\Delta$ <i>eis</i> +WT        | Rv $\Delta$ <i>eis</i> with an integrated copy of pAZ38 <i>eis</i> WT:: <i>attB</i>                                                        | This study          |
| Rv $\Delta$ <i>eis</i> +C-14T     | Rv $\Delta$ <i>eis</i> with an integrated copy of pAZ29 <i>eisC</i> -14T:: <i>attB</i>                                                     | This study          |
| Rv $\Delta$ <i>eis</i> +G-10A     | Rv $\Delta$ <i>eis</i> with an integrated copy of pAZ39 <i>eisG</i> -10A:: <i>attB</i>                                                     | This study          |
| Rv $\Delta$ <i>eis</i> + G-37T    | Rv $\Delta$ <i>eis</i> with an integrated copy of pAZ40 <i>eisG</i> -37T:: <i>attB</i>                                                     | This study          |
| Rv $\Delta$ <i>eis</i> +C-12T     | Rv $\Delta$ <i>eis</i> with an integrated copy of pAZ41 <i>eisC</i> -12T:: <i>attB</i>                                                     | This study          |
| Rv $\Delta$ <i>eis</i> +A-13G     | Rv $\Delta$ <i>eis</i> with an integrated copy of pAZ42 <i>eisA</i> -13G:: <i>attB</i>                                                     | This study          |
| Rv $\Delta$ <i>eis</i> +pHIN-STOP | Rv $\Delta$ <i>eis</i> with an integrated copy of pHIN-STOP :: <i>attB</i>                                                                 | This study          |
| Rv $\Delta$ <i>eis</i> 520        | Rv $\Delta$ <i>eis</i> with an integrated copy of pAZ29 <i>eisC</i> -14T:: <i>attB</i>                                                     | This study          |
| Rv $\Delta$ <i>eis</i> 214        | Rv $\Delta$ <i>eis</i> with an integrated copy of pAZ30 <i>eisC</i> -14T:: <i>attB</i>                                                     | This study          |
| Rv $\Delta$ <i>eis</i> 140        | Rv $\Delta$ <i>eis</i> with an integrated copy of pAZ31 <i>eisC</i> -14T:: <i>attB</i>                                                     | This study          |
| Rv $\Delta$ <i>eis</i> 105        | Rv $\Delta$ <i>eis</i> with an integrated copy of pAZ32 <i>eisC</i> -14T:: <i>attB</i>                                                     | This study          |
| Rv $\Delta$ <i>eis</i> 57         | Rv $\Delta$ <i>eis</i> with an integrated copy of pAZ33 <i>eisC</i> -14T:: <i>attB</i>                                                     | This study          |
| Rv $\Delta$ <i>eis</i> 35         | Rv $\Delta$ <i>eis</i> with an integrated copy of pAZ34 <i>eisC</i> -14T:: <i>attB</i>                                                     | This study          |
| Rv $\Delta$ <i>eis</i> 20         | Rv $\Delta$ <i>eis</i> with an integrated copy of pAZ35 <i>eisC</i> -14T:: <i>attB</i>                                                     | This study          |
| Rv $\Delta$ <i>eis</i> 10         | Rv $\Delta$ <i>eis</i> with an integrated copy of pAZ36 <i>eisC</i> -14T:: <i>attB</i>                                                     | This study          |

Hyg<sup>r</sup>, hygromycin resistant; Kan<sup>r</sup>, kanamycin resistant.

1. Miller LP, Crawford JT, Shinnick TM (1994) The *rpoB* gene of *Mycobacterium tuberculosis*. *Antimicrob Agents Chemother* 38:805–811.
2. Maus CE, Plikaytis BB, Shinnick TM (2005) Molecular analysis of cross-resistance to capreomycin, kanamycin, amikacin, and viomycin in *Mycobacterium tuberculosis*. *Antimicrob Agents Chemother* 49:3192–3197.

**Table S2. Plasmids and phage used in this study**

| Plasmid/phage  | Relevant characteristics                                                                                               | Reference or source |
|----------------|------------------------------------------------------------------------------------------------------------------------|---------------------|
| <b>Plasmid</b> |                                                                                                                        |                     |
| pET19b         | pET vector containing N-terminal His tag, Amp <sup>r</sup>                                                             | Novagen             |
| pET19b-eis     | <i>eis</i> open reading frame cloned into pET19b, Amp <sup>r</sup>                                                     | This study          |
| pYUB178-hyg    | Cosmid vector, Hyg <sup>r</sup>                                                                                        | This study          |
| pYUB854        | Cosmid vector, with <i>res</i> sites flanking the Hyg <sup>r</sup> gene                                                | Bardarov et al. (1) |
| pEIS-KO        | pYUB854 + 900 bp flanking sequence of <i>eis</i>                                                                       | This study          |
| pYUB870        | Helper plasmid, <i>tnpR</i> , <i>sacB</i> , Kan <sup>r</sup>                                                           | Bardarov et al. (1) |
| pAZ09          | <i>Rv2415c</i> cloned into pYUB854 for allelic exchange, Hyg <sup>r</sup>                                              | This study          |
| pAZ10          | pAZ09 + <i>eis</i> WT and 1.2 kb upstream sequence                                                                     | This study          |
| pAZ19          | pAZ09 + <i>eis</i> C-14T 1.2 kb upstream sequence                                                                      | This study          |
| pHIN-STOP      | Integrating mycobacterial vector, Hyg <sup>r</sup> , transcription stop sequence, used for complementation experiments | This study          |
| pAZ29          | pHIN-STOP + <i>eis</i> C-14T and 520 bp upstream sequence                                                              | This study          |
| pAZ30          | pHIN-STOP + <i>eis</i> C-14T and 214 bp upstream sequence                                                              | This study          |
| pAZ31          | pHIN-STOP + <i>eis</i> C-14T and 140 bp upstream sequence                                                              | This study          |
| pAZ32          | pHIN-STOP + <i>eis</i> C-14T and 105 bp upstream sequence                                                              | This study          |
| pAZ33          | pHIN-STOP + <i>eis</i> C-14T and 57 bp upstream sequence                                                               | This study          |
| pAZ34          | pHIN-STOP + <i>eis</i> C-14T and 35 bp upstream sequence                                                               | This study          |
| pAZ35          | pHIN-STOP + <i>eis</i> C-14T and 20 bp upstream sequence                                                               | This study          |
| pAZ36          | pHIN-STOP + <i>eis</i> C-14T and 10 bp upstream sequence                                                               | This study          |
| pAZ38          | pHIN-STOP + <i>eis</i> WT and 520 bp upstream sequence                                                                 | This study          |
| pAZ39          | pHIN-STOP + <i>eis</i> G-10A and 520 bp upstream sequence                                                              | This study          |
| pAZ40          | pHIN-STOP + <i>eis</i> G-37T and 520 bp upstream sequence                                                              | This study          |
| pAZ41          | pHIN-STOP + <i>eis</i> C-12T and 520 bp upstream sequence                                                              | This study          |
| pAZ42          | pHIN-STOP + <i>eis</i> A-13G and 520 bp upstream sequence                                                              | This study          |
| <b>Phage</b>   |                                                                                                                        |                     |
| phAE159        | Mycobacterial phage                                                                                                    | Bardarov et al. (1) |
| phΔ <i>eis</i> | pEIS-KO cloned into phAE159                                                                                            | This study          |
| phALEX-WT      | phAE159 + pAZ10, <i>hyg</i> <sup>r</sup>                                                                               | This study          |
| phALEX-C-14T   | phAE159 + pAZ19, <i>hyg</i> <sup>r</sup>                                                                               | This study          |

Hyg<sup>r</sup>, hygromycin resistant; Amp<sup>r</sup>, ampicillin resistant; Kan<sup>r</sup>, kanamycin resistant.

1. Bardarov S, et al. (1997) Conditionally mycobacteriophages: A system for transposon delivery to *Mycobacterium tuberculosis*. *Proc Natl Acad Sci USA* 94:10961–10966.
